# Supplementary material
Source: MDPI journal article supplement (https://www.mdpi.com/2076-3417/13/17/9757)
Supplement: s1 [file s1]

**Supplementary Material for:**

**Thermoelectric properties of Polyaniline/Bismuth Antimony Telluride Composite Materials**

**Prepared via Mechanical Mixing**

**Savvas Hadjipanteli, Panagiotis S. Ioannou, Theodora Krasia-Christoforou\* and Theodora  
Kyratsi\***

Department of Mechanical and Manufacturing Engineering,

University of Cyprus 1678 Nicosia, Cyprus

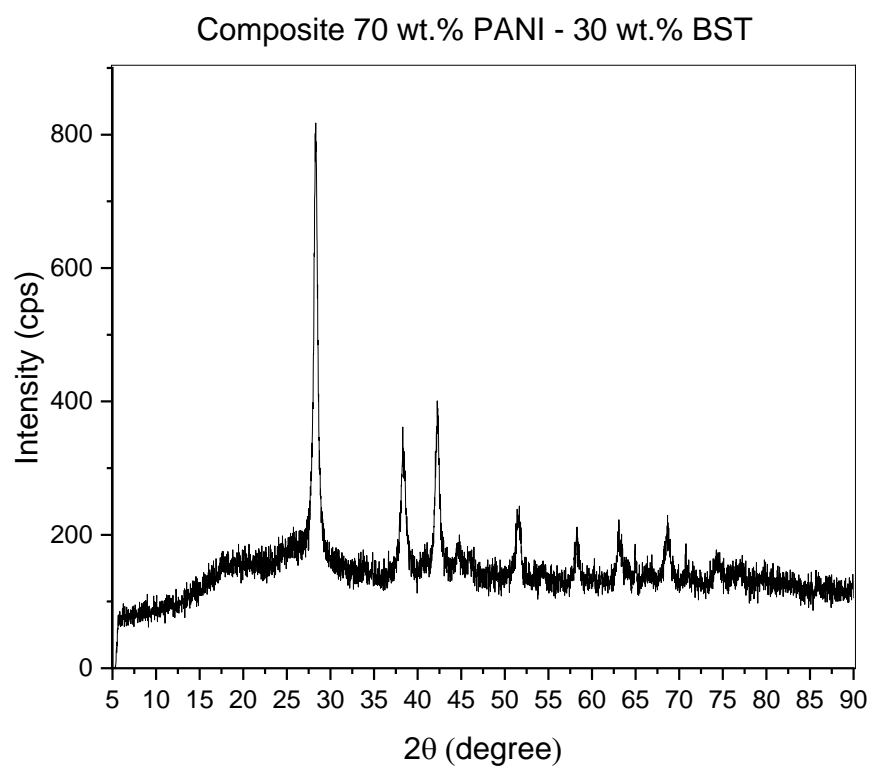

**Figure S1.** Powder XRD of the sample 30-T80-P2-D75 with 30 wt.% BST content.
